# Supplementary material for: Tungsten oxide by non-hydrolytic sol–gel: effect of molecular precursor on morphology, phase and photocatalytic performance
Source: Royal Society of Chemistry journal article supplement (doi:10.1039/c5nj01973g), 2015-10-30
Supplement: c5nj01973g1.pdf [file c5nj01973g1.pdf]

## SUPPORTING INFORMATION

# Tungsten Oxide by Non-Hydrolytic Sol-Gel: Effect of Molecular Precursor on Morphology, Phase and Photocatalytic Performance

Emma Oakton,<sup>a</sup> Georges Siddiqi,<sup>a</sup> Alexey Fedorov,<sup>a</sup> and Christophe Copéret<sup>a\*</sup>

<sup>a</sup> ETH Zürich, Department of Chemistry and Applied Biosciences, Vladimir Prelog Weg 1-5, CH-8093 Zürich, Switzerland.

E-mail: coperet@inorg.chem.ethz.ch

### Characterisation data

|                                                                                                                                                    |   |
|----------------------------------------------------------------------------------------------------------------------------------------------------|---|
| <b>Figure S1.</b> Representative Bright Field TEM image of commercial WO <sub>3</sub> .....                                                        | 2 |
| <b>Figure S2.</b> XRD powder pattern of commercial WO <sub>3</sub> (black) with reference pattern of monoclinic WO <sub>3</sub> (blue lines) ..... | 2 |
| <b>Figure S3.</b> N <sub>2</sub> adsorption-desorption isotherm of commercial WO <sub>3</sub> .....                                                | 3 |
| <b>Table S1.</b> Surface area and electrical conductivity data .....                                                                               | 4 |
| <b>Table S2.</b> Elemental analysis data for the NHSG materials before and after N <sub>2</sub> treatment .....                                    | 4 |
| <b>Table S3.</b> W L <sub>3</sub> -edge energies of WO <sub>x</sub> materials .....                                                                | 4 |

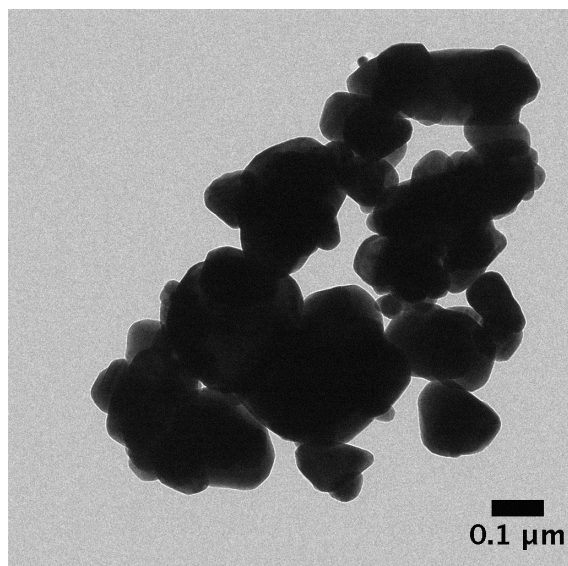

**Figure S1.** Representative Bright Field TEM image of commercial  $\text{WO}_3$

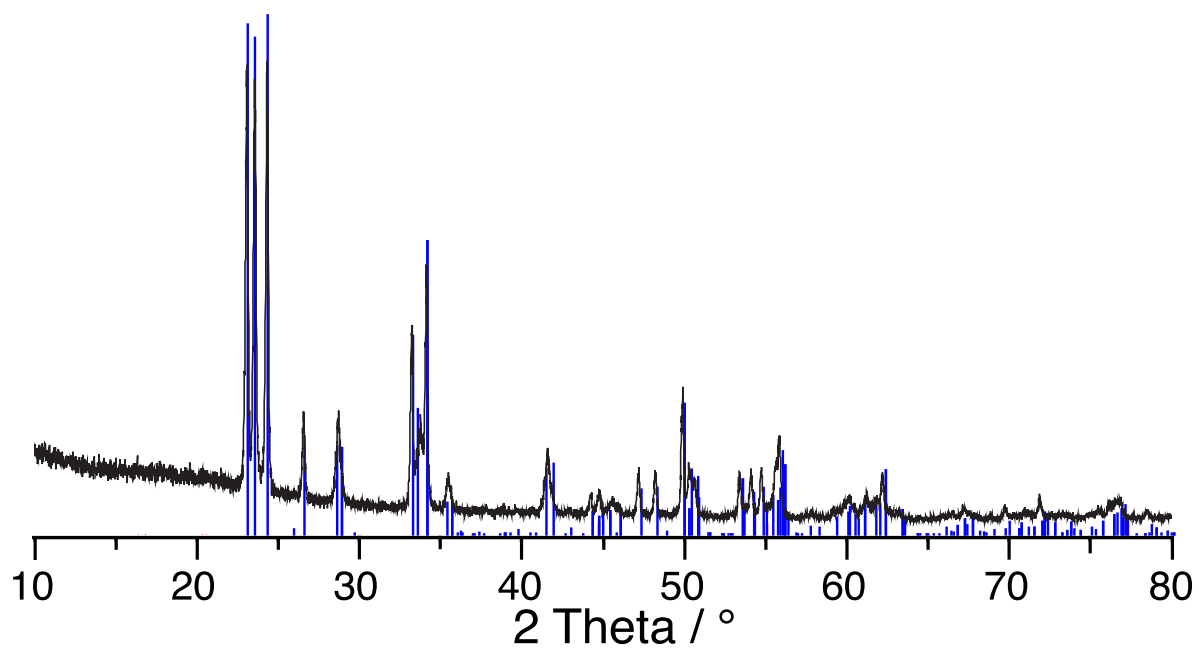

**Figure S2.** XRD powder pattern of commercial  $\text{WO}_3$  (black) with reference pattern of monoclinic  $\text{WO}_3$  (blue lines)

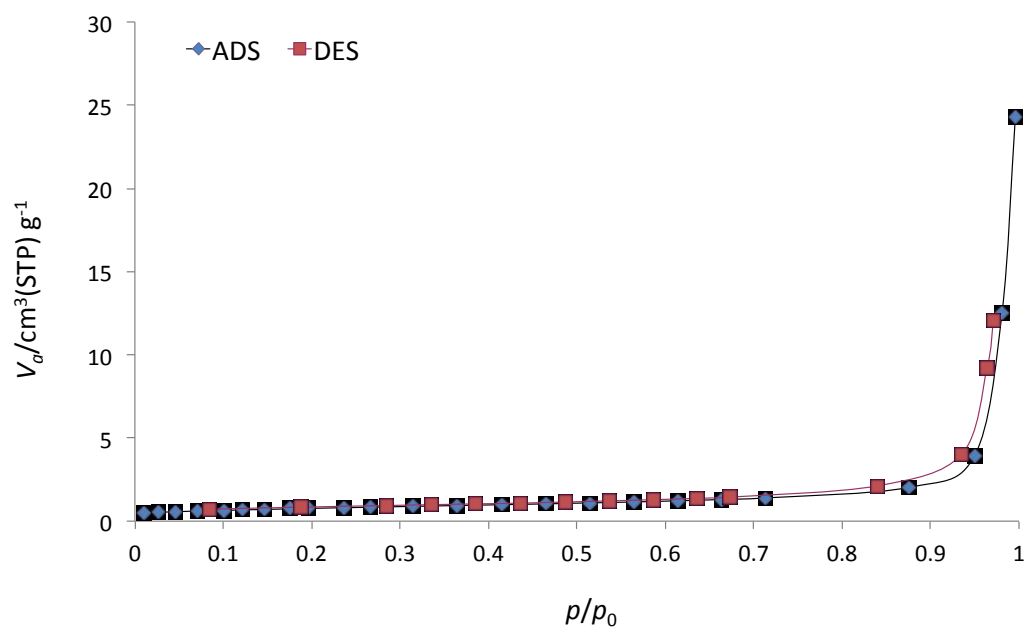

**Figure S3.** N<sub>2</sub> adsorption-desorption isotherm of commercial WO<sub>3</sub>

**Table S1.** Surface area and electrical conductivity data

| Sample                                | $S_{\text{BET}} / \text{m}^2 \cdot \text{g}^{-1}$ | Electrical conductivity / $\text{S} \cdot \text{cm}^{-1}$ |
|---------------------------------------|---------------------------------------------------|-----------------------------------------------------------|
| $\text{WO}_{\text{x(VI)}}$            | 85                                                | $1.5 \cdot 10^{-4}$                                       |
| $\text{WO}_{\text{x(IV)}}$            | 90                                                | $1.0 \cdot 10^{-4}$                                       |
| $\text{WO}_{\text{x(VI)}}\text{-N}_2$ | 42                                                | $4.1 \cdot 10^{-3}$                                       |
| $\text{WO}_{\text{x(IV)}}\text{-N}_2$ | 46                                                | $4.0 \cdot 10^{-2}$                                       |
| Commercial $\text{WO}_3$              | 2.7                                               | $4.5 \cdot 10^{-7}$                                       |

**Table S2.** Elemental analysis data for the NHSG materials before and after  $\text{N}_2$  treatment

| Sample                                | W    | C    | Cl    | N     |
|---------------------------------------|------|------|-------|-------|
| $\text{WO}_{\text{x(VI)}}$            | 78.6 | 0.13 | 0.17  | < 0.2 |
| $\text{WO}_{\text{x(IV)}}$            | 78.3 | 0.87 | 1.55  | < 0.2 |
| $\text{WO}_{\text{x(VI)}}\text{-N}_2$ | 79.1 | 0.14 | < 0.1 | < 0.2 |
| $\text{WO}_{\text{x(IV)}}\text{-N}_2$ | 79.9 | 0.67 | 0.11  | < 0.2 |

**Table S3.** W  $L_3$ -edge energies of  $\text{WO}_x$  materials

| Sample                     | White Line Position / eV |
|----------------------------|--------------------------|
| $\text{WO}_3$              | 10211.56                 |
| $\text{WO}_2$              | 10210.34                 |
| $\text{WO}_{\text{x(VI)}}$ | 10211.21                 |
| $\text{WO}_{\text{x(IV)}}$ | 10210.81                 |
